# Supplementary material
Source: PubMed Central journal article supplement (PMC8200338)
Supplement: 13205_2021_2889_MOESM1_ESM.pdf [file 13205_2021_2889_MOESM1_ESM.pdf]

## ONLINE RESOURCE MATERIAL (3 BIOTECH)

### Neuroprotective effects on amyloid-*beta* induced cytotoxicity of *Pandanus clementis* Merr.

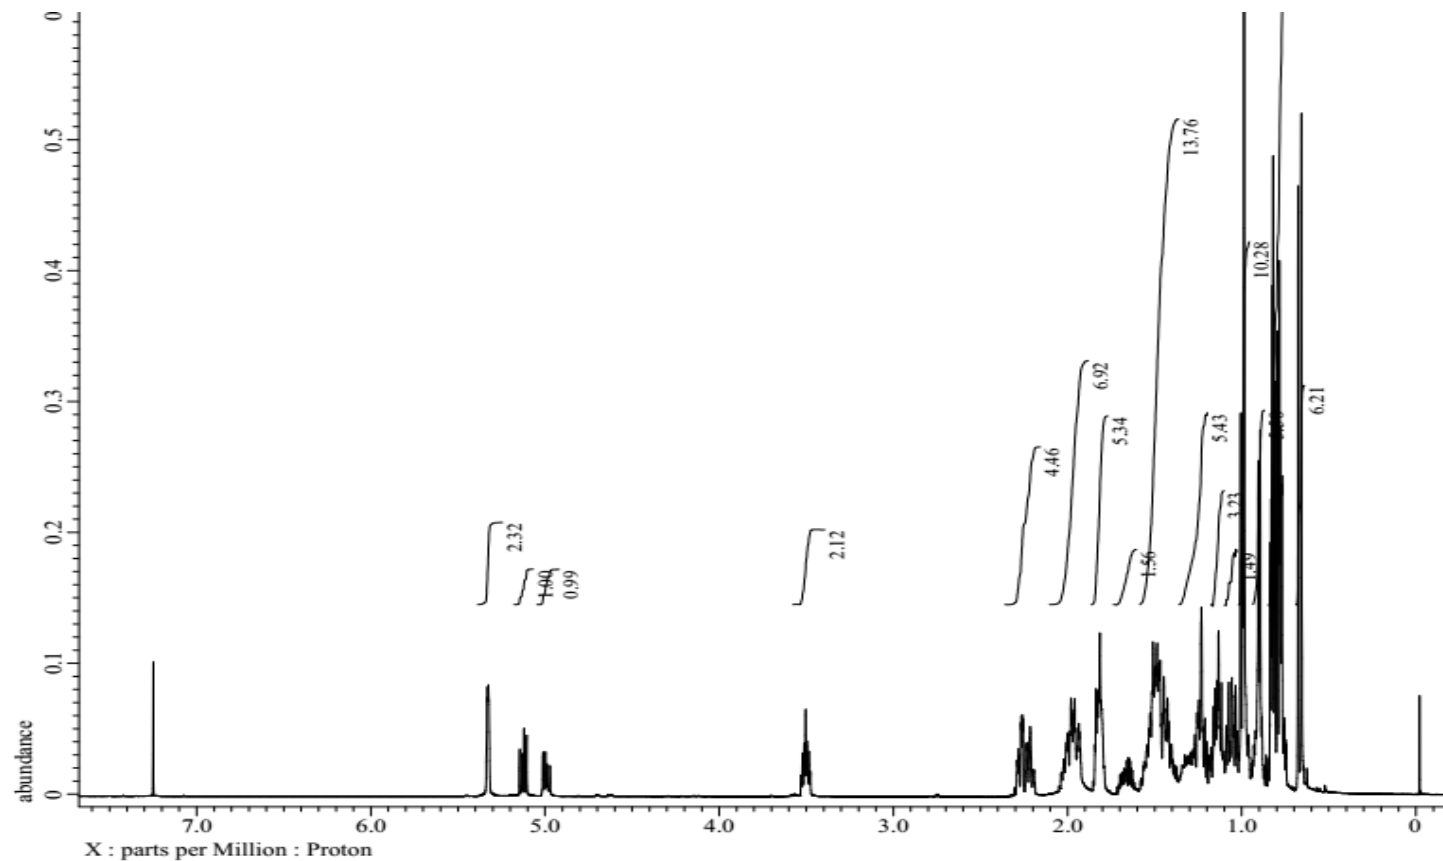

**Fig. S1. 600 MHz  $^1\text{H}$ -NMR of Stigmasterol in  $\text{CDCl}_3$**

Stigmasterol:  $^1\text{H}$  NMR (600 MHz,  $\text{CDCl}_3$ ):  $\delta$  1.08 (1H, m, H-1a); 1.83 (1H, m, H-1b); 1.49 (1H, m, H-2a); 1.82 (1H, m, H-2b); 3.53 (1H, m, H-3); 2.26 (2H, m, H<sub>2</sub>-4); 5.35 (1H, d, J=4.7 Hz, H-6); 1.52 (1H, m, H-7a); 1.98 (1H, m, H-7b); 1.46 (1H, m, H-8); 0.94 (1H, m, H-9); 1.47 (2H, m, H<sub>2</sub>-11); 1.15 (1H, m, H-12a); 1.97 (1H, m, H-12b); 1.00 (1H, m, H-14); 1.06 (1H, m, H-15a); 1.55 (1H, m, H-15b); 1.27 (1H, m, H-16a); 1.71 (1H, m, H-16b); 1.13 (1H, m, H-17); 0.70 (3H, s, H<sub>3</sub>-18); 1.01 (3H, s, H<sub>3</sub>-19); 2.04 (1H, m, H-20); 1.02 (3H, d, J=6.8 Hz, H<sub>3</sub>-21); 5.15 (1H, dd, J=15.1 Hz, 8.4 Hz, H-22); 5.02 (1H, dd, J=15.1 Hz, 8.4 Hz, H-23); 1.53 (1H, m, H-24); 1.44 (1H, m, H-25); 0.84 (3H, d, J=6.4 Hz, H<sub>3</sub>-26); 0.83 (3H, d, J=6.3 Hz, H<sub>3</sub>-27); 1.15 (1H, m, H-28); 0.80 (3H, t, J=6.0 Hz, H<sub>3</sub>-29).

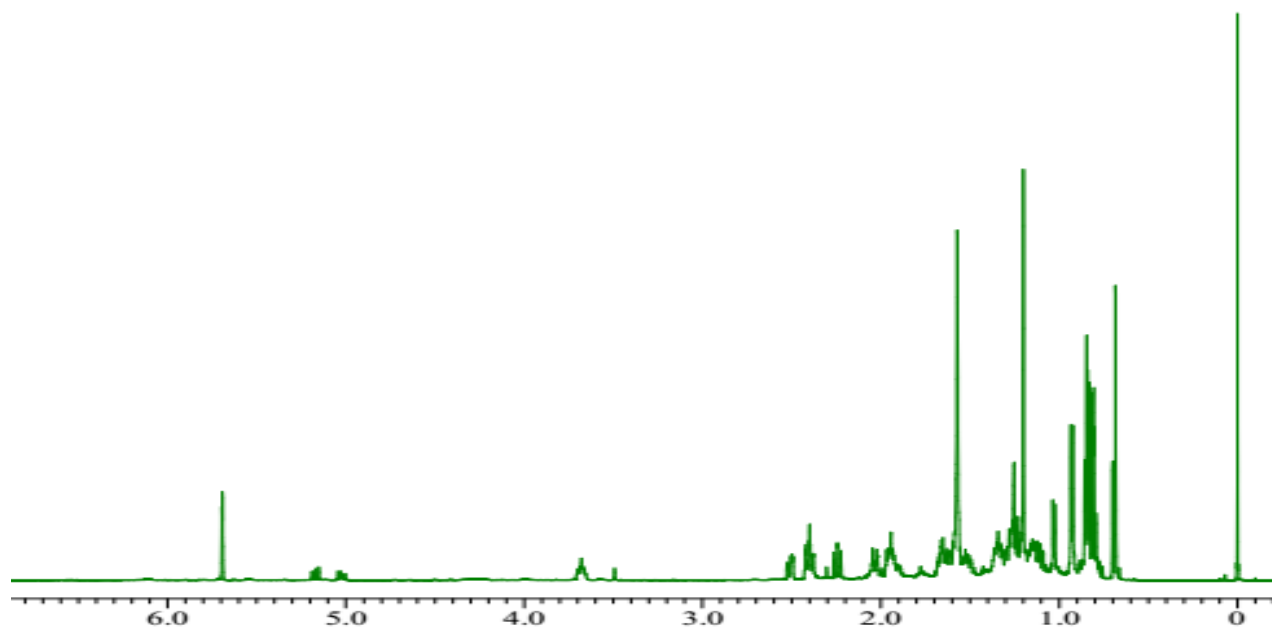

**Fig. S2. 600 MHz <sup>1</sup>H-NMR of α-Spinasterol and Sitostenone mixture in CDCl<sub>3</sub>**

The  $\alpha$ -spinasterol and  $\beta$ -sitostenone were confirmed based on comparison of the mixture NMR spectra with that of pure samples (Fig. S3 and Fig. S4) as retrieved from the literature.

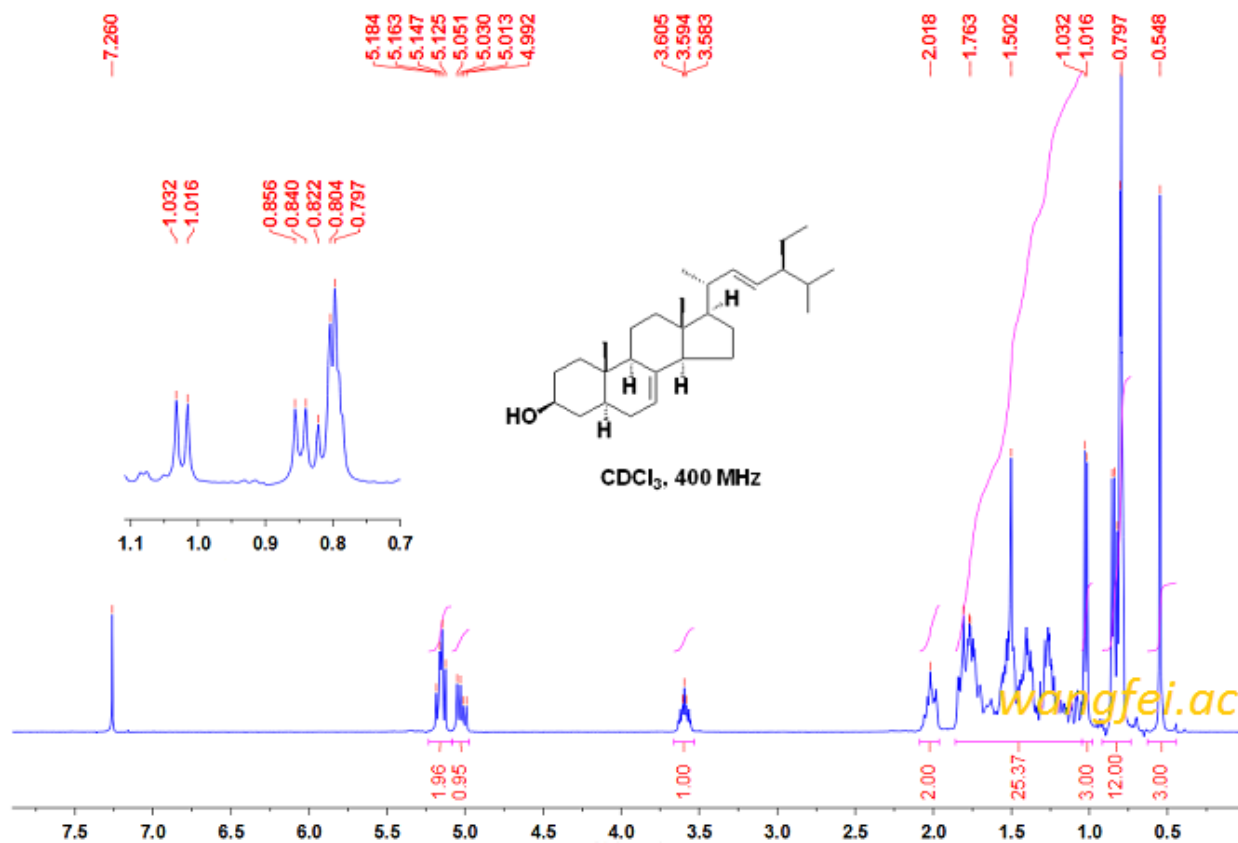

Fig. S3. NMR spectra of  $\alpha$ -spinasterol

Retrieved from: [www.wangfei.ac.cn/rtitle/nmrspectra/7/1/39](http://www.wangfei.ac.cn/rtitle/nmrspectra/7/1/39)

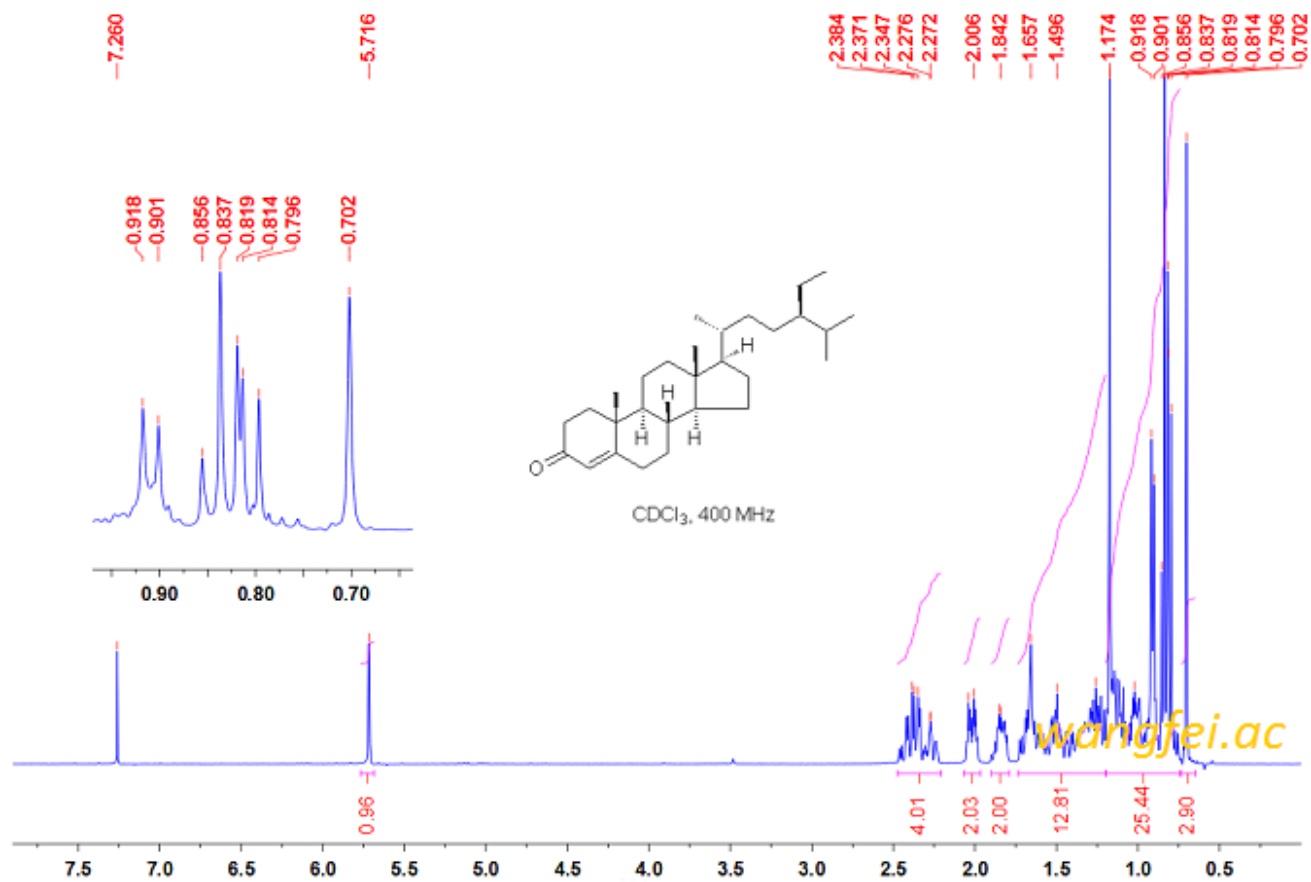

Fig. S4. NMR spectra of Sitostenone

Retrieved from: [www.wangfei.ac.cn/article/nmrspectra/7/1/39](http://www.wangfei.ac.cn/article/nmrspectra/7/1/39)
